# Supplementary material for: Improving Valvular Pathologies and Ventricular Dysfunction Diagnostic Efficiency Using Combined Auscultation and Electrocardiography Data: A Multimodal AI Approach
Source: MDPI journal article supplement (doi:10.3390/s23249834), 2023-12-14
Supplement: s1 [file s1]

**Improving Valvular Pathologies and Ventricular Dysfunction Diagnostic Efficiency Using  
Combined Auscultation and  
Electrocardiography Data: A Multimodal AI Approach**

**Supplementary information**

**Supplementary Table 1. Training conditions of CNN**

|                    |               |                                           |
|--------------------|---------------|-------------------------------------------|
| Equipment          | CPU           | Intel(R) Xeon(R) CPU E5-1650 v2 @ 3.50GHz |
|                    | GPU           | GeForce GTX 1080 Ti                       |
| Learning condition | Epoch number  | 100                                       |
|                    | Learning rate | 0.001                                     |
|                    | Optimizer     | Adam                                      |
